# Supplementary material for: Modeling and Thermodynamic Analysis of the Water Sorption Isotherms of Cottonseed Products
Source: MDPI journal article supplement (doi:10.3390/foundations1010005), 2021-07-12
Supplement: s1 [file s1]

# Modeling and thermodynamic analysis of the water sorption isotherms of cottonseed products

Zhongqi He <sup>1, \*</sup>, David Zhang <sup>1</sup> and Huai N. Cheng <sup>1</sup>

## Supplemental materials

**Table S1.** Salts and the water activities ( $a_w$ ) of their saturated salt solutions at different temperatures.

**Table S2.** The results of two-factor ANOVA with replication (n=2).

**Table S3.** The six sorption isotherm models better fitting the experimental data of defatted cottonseed products.

**Figure S1.** Apparatus illustration for the sorption isotherm measurement.

References cited in Table 1S.

1. Miranda, M.; Vega-Galvez, A.; Sanders, M.; Lopez, J.; Lemus-Mondaca, R.; Martinez, E.; Di Scala, K. Modelling the water sorption isotherms of quinoa seeds (*chenopodium quinoa* willd.) and determination of sorption heats. *Food Bioprocess Technol.* **2012**, *5*, 1686-1693.
2. Taitano, L.; Singh, R.; Lee, J.; Kong, F. Thermodynamic analysis of moisture adsorption isotherms of raw and blanched almonds. *J. Food Process Engineer.* **2012**, *35*, 840-850.
3. Tunc, S.; Duman, O. Thermodynamic properties and moisture adsorption isotherms of cottonseed protein isolate and different forms of cottonseed samples. *J. Food Engineer.* **2007**, *81*, 133-143.

**Table S1.** Salts and the water activities ( $a_w$ ) of their saturated salt solutions at different temperatures. Data adapted from literature [1-3].

| Salt                                            | $a_w$ at 15°C | $a_w$ at 25°C | $a_w$ at 35°C | $a_w$ at 45°C |
|-------------------------------------------------|---------------|---------------|---------------|---------------|
| LiCl                                            | 0.1130        | 0.1130        | 0.1125        | 0.1116        |
| MgCl <sub>2</sub>                               | 0.3330        | 0.3278        | 0.3205        | 0.3110        |
| K <sub>2</sub> CO <sub>3</sub>                  | 0.4315        | 0.4316        | 0.4320        | 0.4320        |
| Mg(NO <sub>3</sub> ) <sub>2</sub>               | 0.5587        | 0.5289        | 0.4991        | 0.4693        |
| KI                                              | 0.7098        | 0.6886        | 0.6696        | 0.6526        |
| NaCl                                            | 0.7561        | 0.7529        | 0.7487        | 0.7452        |
| (NH <sub>4</sub> ) <sub>2</sub> SO <sub>4</sub> | 0.8170        | 0.8099        | 0.8027        | 0.7956        |
| KCl                                             | 0.8592        | 0.8434        | 0.8295        | 0.8174        |

**Table S2.** The results of two-factor ANOVA with replication (n=2)

| <b>(A) Defatted cottonseed meal</b> |             |           |           |          |                |               |
|-------------------------------------|-------------|-----------|-----------|----------|----------------|---------------|
| <i>Source of Variation</i>          | <i>SS</i>   | <i>df</i> | <i>MS</i> | <i>F</i> | <i>P-value</i> | <i>F crit</i> |
| Temperature                         | 2425.35599  | 7         | 346.4794  | 2433.172 | 9.28E-42       | 2.312741      |
| Saturated salt solution             | 326.5834574 | 3         | 108.8612  | 764.4837 | 7.58E-30       | 2.90112       |
| Interaction (Temperature X salt)    | 126.9758515 | 21        | 6.046469  | 42.46168 | 1.04E-17       | 1.895706      |
| Within                              | 4.556744284 | 32        | 0.142398  |          |                |               |
| Total                               | 2883.472043 | 63        |           |          |                |               |

  

| <b>(B) water washed defatted cottonseed meal</b> |             |           |           |          |                |               |
|--------------------------------------------------|-------------|-----------|-----------|----------|----------------|---------------|
| <i>Source of Variation</i>                       | <i>SS</i>   | <i>df</i> | <i>MS</i> | <i>F</i> | <i>P-value</i> | <i>F crit</i> |
| Temperature                                      | 1113.824403 | 7         | 159.1178  | 244.9574 | 6.15E-26       | 2.312741      |
| Saturated salt solution                          | 110.256177  | 3         | 36.75206  | 56.57876 | 6.84E-13       | 2.90112       |
| Interaction (Temperature X salt)                 | 10.63220031 | 21        | 0.506295  | 0.779427 | 0.721661       | 1.895706      |
| Within                                           | 20.78634783 | 32        | 0.649573  |          |                |               |
| Total                                            | 1255.499128 | 63        |           |          |                |               |

  

| <b>(C) Cottonseed protein isolate</b> |             |           |           |          |                |               |
|---------------------------------------|-------------|-----------|-----------|----------|----------------|---------------|
| <i>Source of Variation</i>            | <i>SS</i>   | <i>df</i> | <i>MS</i> | <i>F</i> | <i>P-value</i> | <i>F crit</i> |
| Temperature                           | 997.9564301 | 7         | 142.5652  | 2033.425 | 1.63E-40       | 2.312741      |
| Saturated salt solution               | 138.6405124 | 3         | 46.2135   | 659.1488 | 7.84E-29       | 2.90112       |
| Interaction (Temperature X salt)      | 9.075213836 | 21        | 0.432153  | 6.163851 | 2.67E-06       | 1.895706      |
| Within                                | 2.243548379 | 32        | 0.070111  |          |                |               |
| Total                                 | 1147.915705 | 63        |           |          |                |               |

**Table S3.** The six sorption isotherm models better fitting the experimental data of defatted cottonseed products

| Name of model | Equation                                                          |
|---------------|-------------------------------------------------------------------|
| B.E.T.        | $\frac{a_w}{(1-a_w)M} = \frac{1}{M_m C} + \frac{a_w(C-1)}{M_m C}$ |
| Bradley       | $\ln\left(\frac{1}{a_w}\right) = K_2 K_1^M$                       |
| G.A.B.        | $M = \frac{M_0 C K a_w}{(1-K a_w)(1-K a_w + C K a_w)}$            |
| Halsey        | $a_w = e^{-\frac{a''}{M^F}}$                                      |
| Henderson     | $\ln[-\ln(1 - a_w)] = n \cdot \ln M + \ln k$                      |
| Oswin         | $M = a \left(\frac{a_w}{1-a_w}\right)^n$                          |

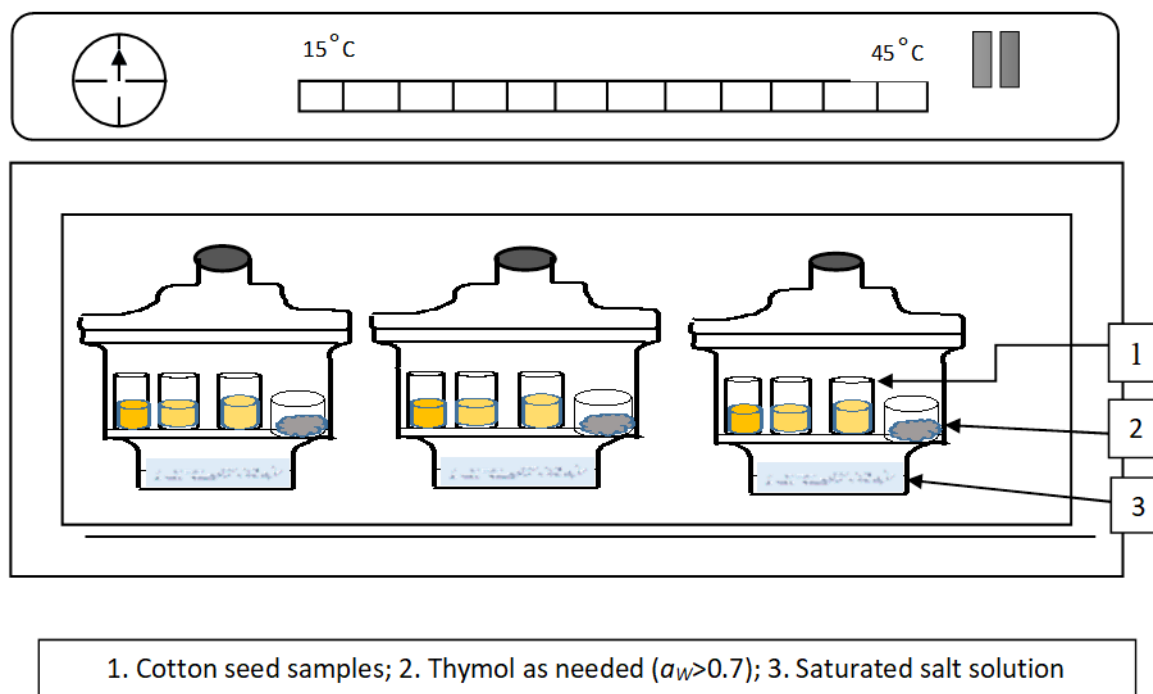

**Figure S1.** Apparatus illustration for the sorption isotherm measurement.
